# Supplementary material for: Differential Protein Expression among Two Different Ovine ARDS Phenotypes—A Preclinical Randomized Study
Source: MDPI journal article supplement (doi:10.3390/metabo12070655), 2022-07-15
Supplement: s1 [file s1]

# ONLINE SUPPLEMENT

## Supplemental Results

- 1) Table S1 Baseline characteristics
- 2) Table S2 Clinical and laboratory parameters at T12 and T24
- 3) Figure S1 Cytokine levels in plasma among phenotypes at different time points during observation time
- 4) Figure S2 Histopathological assessment of the lungs at study end
- 5) Figure S3 Correlation plot of all samples
- 6) Table S3 Differentially expressed proteins among Ph1 and Ph2 at every time point
- 7) Figure S4 PLS-DA: features per component and initial error rate
- 8) Table S4 Biological processes and associated proteins in pathway analysis

## Supplemental Methods

- 1) Figure S5 Study design and time line
- 2) Adherence to main features of experimental ALI according to the ATS definition

## Supplemental Results

**Table S1** Baseline characteristics

| .                                        | all              | Ph1, n=5         | Ph2, n=4         | p    |
|------------------------------------------|------------------|------------------|------------------|------|
| Weight (kg)                              | 48 (44-51)       | 48 (45-52)       | 47 (43-52)       | 0.9  |
| Body surface area (per m <sup>2</sup> )  | 1.3 (1.2-1.3)    | 1.3 (1.2-1.3)    | 1.2 (1.2-1.3)    | 0.9  |
| Temperature (°C)                         | 38.7 (37.9-38.9) | 38.1 (37.7-38.7) | 38.9 (38.0-39.4) | 0.2  |
| Hemodynamic parameters                   |                  |                  |                  |      |
| Mean arterial blood pressure (mmHg)      | 122 (90-129)     | 122 (88-127)     | 121 (83-130)     | 0.7  |
| Heart rate (bpm)                         | 72 (63-103)      | 90 (63-105)      | 72 (55-95)       | 0.6  |
| Cardiac index                            | 4.4 (3.3-5.3)    | 4.5 (3.2-6.6)    | 4.3 (3.4-5.4)    | 0.7  |
| Mechanical ventilation                   |                  |                  |                  |      |
| Minute ventilation (L/min)               | 6.4 (5.5-6.9)    | 6.1 (5.3-6.9)    | 6.6 (5.7-6.9)    | 0.6  |
| Compliance (mL/cmH <sub>2</sub> O)       | 33.4 (26.5-42.3) | 33.4 (26.7-53.0) | 35.0 (23.8-40.0) | 0.7  |
| PEEP (cmH <sub>2</sub> O)                | 5 (5-5)          | 5 (5-5)          | 5 (5-5)          | 1.0  |
| Plateau pressure (cm H <sub>2</sub> O)   | 15 (13-20)       | 15 (13-22)       | 15 (13-22)       | 1.0  |
| Extravascular lung water index           | 27 (24-32)       | 27 (18-37)       | 28 (25-29)       | 1.0  |
| Blood gases                              |                  |                  |                  |      |
| PaO <sub>2</sub> /FiO <sub>2</sub> ratio | 494 (412-528)    | 492 (284-513)    | 518 (499-533)    | 0.3  |
| PaCO <sub>2</sub> (mmHg)                 | 41 (40-44)       | 43 (41-47)       | 41 (39-41)       | 0.1  |
| Oxyhemoglobin                            | 98 (98-99)       | 98 (96-99)       | 98 (98-99)       | 0.7  |
| Lactate                                  | 0.8 (0.4-1.0)    | 0.8 (0.4-1.1)    | 0.7 (0.4-0.9)    | 0.7  |
| Base excess (mmol/L)                     | 2.0 (-0.2-3.9)   | 2.0 (0.4-4.7)    | 1.2 (-0.3-3.5)   | 0.4  |
| Bicarbonate (mmol/L)                     | 27 (24-28)       | 27 (25-29)       | 25 (23-27)       | 0.3  |
| Full blood count                         |                  |                  |                  |      |
| Hemoglobin (g/L)                         | 113 (105-121)    | 118 (104-122)    | 109 (105-119)    | 0.7  |
| Platelets (10 <sup>9</sup> /L)           | 364 (250-413)    | 278 (204-413)    | 368 (278-426)    | 0.6  |
| Neutrophil count (10 <sup>9</sup> /L)    | 1.8 (1.6-2.2)    | 2.1 (1.6-2.8)    | 1.7 (1.5-1.9)    | 0.3  |
| Lymphocyte count (10 <sup>9</sup> /L)    | 2.9 (2.6-3.6)    | 2.9 (2.6-4.0)    | 2.9 (2.5-3.2)    | 0.7  |
| Biochemistry                             |                  |                  |                  |      |
| Sodium (mmol/L)                          | 143 (141-145)    | 143 (141-145)    | 142 (140-144)    | 0.4  |
| Potassium (mmol/L)                       | 4.7 (4.3-4.8)    | 4.3 (4.3-4.7)    | 4.8 (4.6-5.7)    | 0.1  |
| Creatinine (mmol/L)                      | 0.06 (0.06-0.08) | 0.08 (0.06-0.08) | 0.06 (0.05-0.08) | 0.3  |
| Bilirubin (umol/L)                       | 4 (3-4)          | 3 (3-4)          | 4 (3-4)          | 0.1  |
| ASAT (IU/L)                              | 93 (85-108)      | 90 (77-99)       | 105 (93-134)     | 0.1  |
| ALP (IU/L)                               | 154 (121-294)    | 148 (74-213)     | 247 (140-343)    | 0.3  |
| CK (IU/L)                                | 192 (119-240)    | 128 (100-228)    | 214 (171-250)    | 0.2  |
| Albumin (g/L)                            | 34.0 (32.5-36.5) | 34.0 (32.5-37.0) | 34.0 (32.3-36.5) | 0.9  |
| Cytokines                                |                  |                  |                  |      |
| IL-6 plasma (pg/ml)                      | 313 (0.4)        | 313 (0.4)        | 313 (0.5)        | 0.9  |
| IL-8 plasma (pg/ml)                      | 875 (625)        | 1248 (573)       | 409 (286)        | 0.03 |
| IL-10 plasma (pg/ml)                     | 992 (497)        | 985 (459)        | 999 (614)        | 1.0  |

Parameters displayed as median and IQR, cytokine levels as mean and standard deviation.

Abbreviations: Ph1 and Ph2: phenotype 1 and 2; PEEP: positive end-expiratory pressure; PaCO<sub>2</sub> (mmHg): arterial carbondioxide partial pressure; ASAT: aspartate transaminase; ALP: alkaline phosphatase; CK: creatin kinase, IL: interleukin.

**Table S2** Clinical and laboratory parameters at T12 and T24

|                                          | at T12            |                  |                    | at T24              |                     |                     |
|------------------------------------------|-------------------|------------------|--------------------|---------------------|---------------------|---------------------|
|                                          | all, n=9          | Ph1, n=5         | Ph2, n=4           | all, n=9            | Ph1, n=5            | Ph2, n=4            |
| Temperature (°C)                         | 38.9 (37.8-39.4)  | 39.8 (37.3-39.2) | 39.3 (38.1-39.9)   | 38.7 (38.2-39.4)    | 38.6 (38.2-39.1)    | 39.2 (38.1-39.9)    |
| Hemodynamic parameters                   |                   |                  |                    |                     |                     |                     |
| Mean arterial blood pressure (mmHg)      | 71 (61-74)        | 71 (54-74)       | 71 (66-80)         | 76 (63-78)          | 64 (58-78)          | 77 (72-81)          |
| Use of noradrenaline (mcg/kg/min)        | 0.17 (0.10-0.27)  | 0.17 (0.03-0.27) | 0.19 (0.15-0.33)   | 0.25 (0.17-0.34)    | 0.25 (0.21-0.29)    | 0.28 (0.15-0.39)    |
| Heart rate (bpm)                         | 107 (61-74)       | 105 (96-130)     | 124 (96-142)       | 122 (101-128)       | 116 (101-126)       | 122 (99-133)        |
| Cardiac index                            | 4.9 (3.7-6.2)     | 3.9 (3.5-6.2)    | 5.6 (5.0-6.4)      | 6.5 (5.8-7.4)       | 6.2 (5.4-6.9)       | 7.1 (6.0-9.0)       |
| Mechanical ventilation                   |                   |                  |                    |                     |                     |                     |
| Minute ventilation (L/min)               | 10.8 (9.1-11.9)   | 10.7 (8.4-11.0)  | 11.9 (9.2-14.9)    | 14.7 (10.8-15.8)    | 13.8 (10.8-15.2)    | 15.4 (11.4-17.0)    |
| Compliance (mL/cmH <sub>2</sub> O)       | 17.4 (14.7-21.0)  | 15.6 (13.3-23.7) | 17.7 (15.7-19.5)   | 19.0 (15.5-22.4)    | 18.5 (13.5-20.4)    | 21.0 (16.6-25.0)    |
| Plateau pressure (cm H <sub>2</sub> O)   | 22 (21-26)        | 22 (19-27)       | 22.5 (21.8-27.4)   | 26 (21-28)          | 26 (21-28)          | 24 (20-28)          |
| Extravascular lung water index           | 49 (42-55)        | 55 (39-55)       | 49 (39-54)         | 50 (43-55)          | 50 (32-55)          | 48 (42-54)          |
| Blood gases                              |                   |                  |                    |                     |                     |                     |
| PaO <sub>2</sub> /FiO <sub>2</sub> ratio | 272 (209-324)     | 220 (174-290)    | 295 (273-329)      | 268 (216-309)       | 258 (136-278)       | 299 (265-339)       |
| PaCO <sub>2</sub> (mmHg)                 | 47 (42-58)        | 47 (42-60)       | 48 (39-56)         | 52 (41-59)          | 52 (41-57)          | 53 (40-63)          |
| Lactate                                  | 2.4 (2.0-4.3)     | 2.3 (2.0-3.3)    | 3.6 (1.7-6.5)      | 2.6 (1.6-4.3)       | 2.3 (1.6-2.6)       | 3.8 (1.3-8.7)       |
| Base excess (mmol/L)                     | -0.8 (-3.4-0.1)   | 0 (-1.9-0.5)     | -2.4 (-4.3-0.1)    | -3.2 (-4.3-1.8)     | -3.2 (-3.9-0.4)     | -3.7 (-6.6-2.4)     |
| Full blood count                         |                   |                  |                    |                     |                     |                     |
| Hemoglobin (g/L)                         | 113 (97-123)      | 113 (96-118)     | 113 (96-126)       | 108 (98-115)        | 108 (103-117)       | 103 (92-113)        |
| Platelets (10 <sup>9</sup> /L)           | 237 (142-267)     | 250 (189-267)    | 176 (82-271)       | 188 (91-223)        | 217 (123-234)       | 140 (51-217)        |
| Neutrophil count (10 <sup>9</sup> /L)    | 1.2 (0.8-1.5)     | 0.8 (0.7-1.2)    | 1.5 (1.2-2.0)      | 0.7 (0.3-1.3)       | 0.4 (0.2-0.7)       | 1.3 (0.6-1.5)       |
| Lymphocyte count (10 <sup>9</sup> /L)    | 0.9 (0.8-1.3)     | 1.0 (0.6-1.4)    | 0.9 (0.9-1.2)      | 1.4 (0.9-1.8)       | 1.2 (0.9-1.8)       | 1.4 (0.9-1.9)       |
| Biochemistry                             |                   |                  |                    |                     |                     |                     |
| Sodium (mmol/L)                          | 144 (143-147)     | 144 (142-148)    | 145 (143-147)      | 146 (144-150)       | 146 (144-151)       | 147 (144-151)       |
| Potassium (mmol/L)                       | 5.3 (4.8-6.5)     | 4.9 (4.4-6.3)    | 5.8 (5.0-6.6)      | 5.3 (4.9-6.3)       | 5.3 (4.8-6.2)       | 5.4 (4.9-6.8)       |
| Creatinine (mmol/L)                      | 0.12 (0.08-0.15)  | 0.12 (0.08-0.15) | 0.14 (0.09-0.16)   | 0.14 (0.11-0.25)    | 0.14 (0.12-0.26)    | 0.15 (0.11-0.24)    |
| Bilirubin (umol/L)                       | 6 (2-13)          | 4 (0.5-15)       | 8 (4-14)           | 8 (6-19)            | 6 (4-20)            | 9 (7-19)            |
| ASAT (IU/L)                              | 196 (160-242)     | 180 (139-233)    | 215 (192-314)      | 353 (295-501)       | 353 (261-477)       | 383 (317-544)       |
| ALP (IU/L)                               | 107 (62-184)      | 80 (35-122)      | 184 (100-249)      | 89 (52-195)         | 75 (31-123)         | 195 (96-224)        |
| CK (IU/L)                                | 8119 (4597-12030) | 6709 (2150-9514) | 11157 (8557-14990) | 21462 (15409-25673) | 21462 (12105-31112) | 21610 (18656-24386) |
| Albumin (g/L)                            | 21.0 (19.5-22.0)  | 22.0 (21.0-22.5) | 19.5 (16.5-21.0)   | 20.0 (17.0-21.5)    | 21.0 (18.5-22.0)    | 18.5 (14.8-20.8)    |
| Cytokines                                |                   |                  |                    |                     |                     |                     |
| IL-6 plasma (pg/ml)                      | 217133 (183445)   | 1105456 (81890)  | 350480 (195261)    | 198673 (151525)     | 127902 (59632)      | 287137 (194173)     |
| IL-8 plasma (pg/ml)                      | 815 (658)         | 918 (865)        | 685 (341)          | 1524 (1430)         | 1916 (1562)         | 1034 (1275)         |
| IL-10 plasma (pg/ml)                     | 2458 (925)        | 2482 (865)       | 2427 (1106)        | 2789 (892)          | 2922 (940)          | 2625 (938)          |

Parameters displayed as median and IQR, cytokine levels as mean and standard deviation.

Abbreviations: Ph1 and Ph2: phenotype 1 and 2; PaCO<sub>2</sub> (mmHg): arterial carbon dioxide partial pressure; ASAT: aspartate transaminase; ALP: alkaline phosphatase; CK: creatine kinase, IL: interleukin; IFN $\gamma$ : interferon gamma.

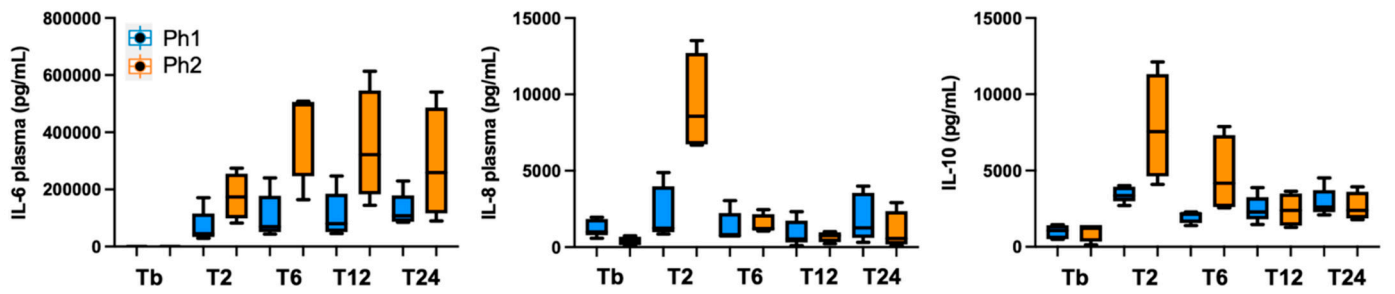

**Figure S1** Cytokine levels in plasma among phenotypes at different time points during observation time. Abbreviations: Ph1 and Ph2: phenotype 1 and 2; IL: interleukin; Tb: baseline; T: time point.

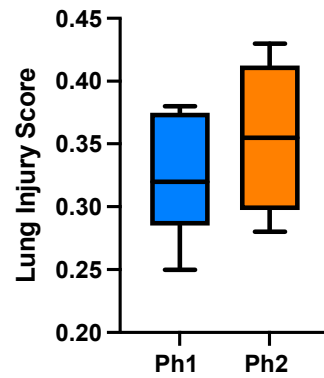

**Figure S2** Histopathological assessment of the lungs at study end. Abbreviations: Ph1 and Ph2: phenotype 1 and 2

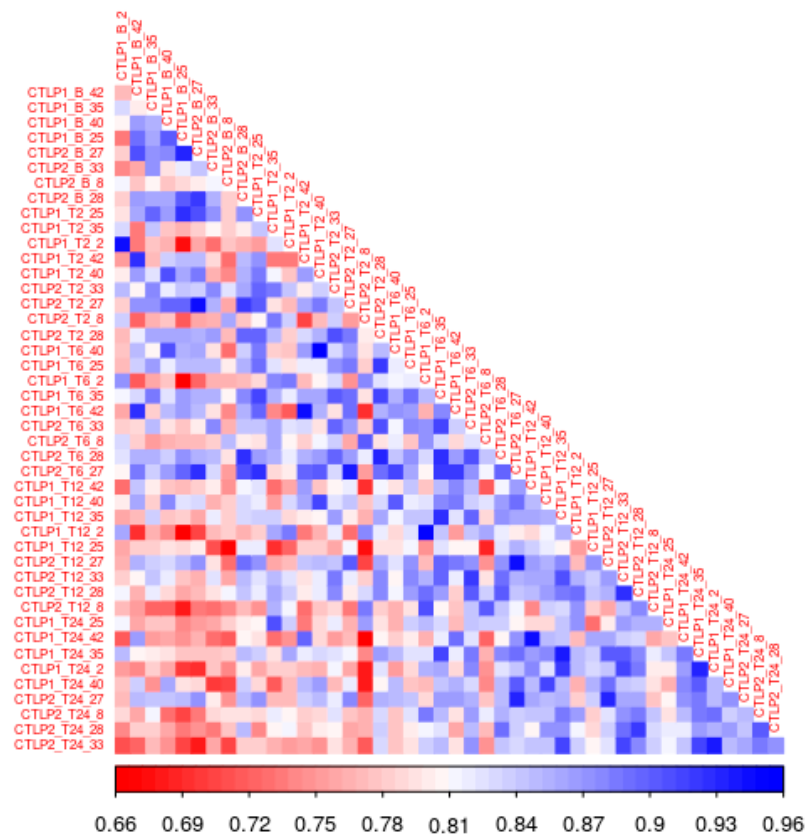

**Figure S3** Correlation plot of all samples. Abbreviations: P1 and P2 = phenotype 1 and 2; CTL = control; T = time point

**Table S3** Differentially expressed proteins among Ph1 and Ph2 at every time point

| <b>Baseline</b> | <b>protein</b>                                                       | <b>p (wilc)</b> |
|-----------------|----------------------------------------------------------------------|-----------------|
|                 | apolipoprotein A-II [Ovis aries]                                     | 0.015873016     |
|                 | CD5 antigen-like [Ovis aries]                                        | 0.015873016     |
|                 | complement factor I [Ovis aries]                                     | 0.015873016     |
|                 | hypothetical protein JEQ12_008015 [Ovis aries]                       | 0.015873016     |
|                 | hypothetical protein JEQ12_008126 [Ovis aries]                       | 0.015873016     |
|                 | hypothetical protein JEQ12_010483 [Ovis aries]                       | 0.015873016     |
|                 | hypothetical protein JEQ12_014972 [Ovis aries]                       | 0.015873016     |
|                 | immunoglobulin J chain [Ovis aries]                                  | 0.015873016     |
|                 | complement component C8 gamma chain [Ovis aries]                     | 0.028571429     |
|                 | lumican [Ovis aries]                                                 | 0.028571429     |
|                 | clusterin [Ovis aries]                                               | 0.031746032     |
|                 | heparin cofactor 2 [Ovis aries]                                      | 0.031746032     |
|                 | hypothetical protein JEQ12_001510 [Ovis aries]                       | 0.031746032     |
|                 | hypothetical protein JEQ12_002713 [Ovis aries]                       | 0.031746032     |
|                 | inter-alpha-trypsin inhibitor heavy chain H2 isoform X2 [Ovis aries] | 0.031746032     |
|                 | plasma protease C1 inhibitor [Ovis aries]                            | 0.031746032     |
| <b>T2</b>       | <b>Protein</b>                                                       | <b>p (wilc)</b> |
|                 | synaptotagmin-like protein 4 isoform X3 [Ovis aries]                 | 0.031746032     |
| <b>T6</b>       | <b>Protein</b>                                                       | <b>p (wilc)</b> |
|                 | hypothetical protein JEQ12_002713 [Ovis aries]                       | 0.015873016     |
|                 | hypothetical protein JEQ12_008129, partial [Ovis aries]              | 0.028571429     |
| <b>T12</b>      | <b>Protein</b>                                                       | <b>p (wilc)</b> |
|                 | hypothetical protein JEQ12_008126 [Ovis aries]                       | 0.031746032     |
| <b>T24</b>      | <b>Protein</b>                                                       | <b>p (wilc)</b> |
|                 | adiponectin isoform X1 [Ovis aries]                                  | 0.015873016     |
|                 | hypothetical protein JEQ12_008022 [Ovis aries]                       | 0.015873016     |
|                 | hypothetical protein JEQ12_010483 [Ovis aries]                       | 0.015873016     |
|                 | immunoglobulin J chain [Ovis aries]                                  | 0.015873016     |
|                 | lumican [Ovis aries]                                                 | 0.015873016     |
|                 | plasma protease C1 inhibitor [Ovis aries]                            | 0.015873016     |
|                 | apolipoprotein E [Ovis aries]                                        | 0.028571429     |
|                 | C4b-binding protein alpha chain isoform X8 [Ovis aries]              | 0.028571429     |
|                 | alpha-2-HS-glycoprotein precursor [Ovis aries]                       | 0.031746032     |
|                 | apolipoprotein A-I isoform X1 [Ovis aries]                           | 0.031746032     |
|                 | apolipoprotein A-IV [Ovis aries]                                     | 0.031746032     |
|                 | complement factor I [Ovis aries]                                     | 0.031746032     |
|                 | gelsolin isoform X4 [Ovis aries]                                     | 0.031746032     |
|                 | hypothetical protein JEQ12_002713 [Ovis aries]                       | 0.031746032     |
|                 | hypothetical protein JEQ12_003887 [Ovis aries]                       | 0.031746032     |
|                 | hypothetical protein JEQ12_008126 [Ovis aries]                       | 0.031746032     |
|                 | hypothetical protein JEQ12_013893 [Ovis aries]                       | 0.031746032     |

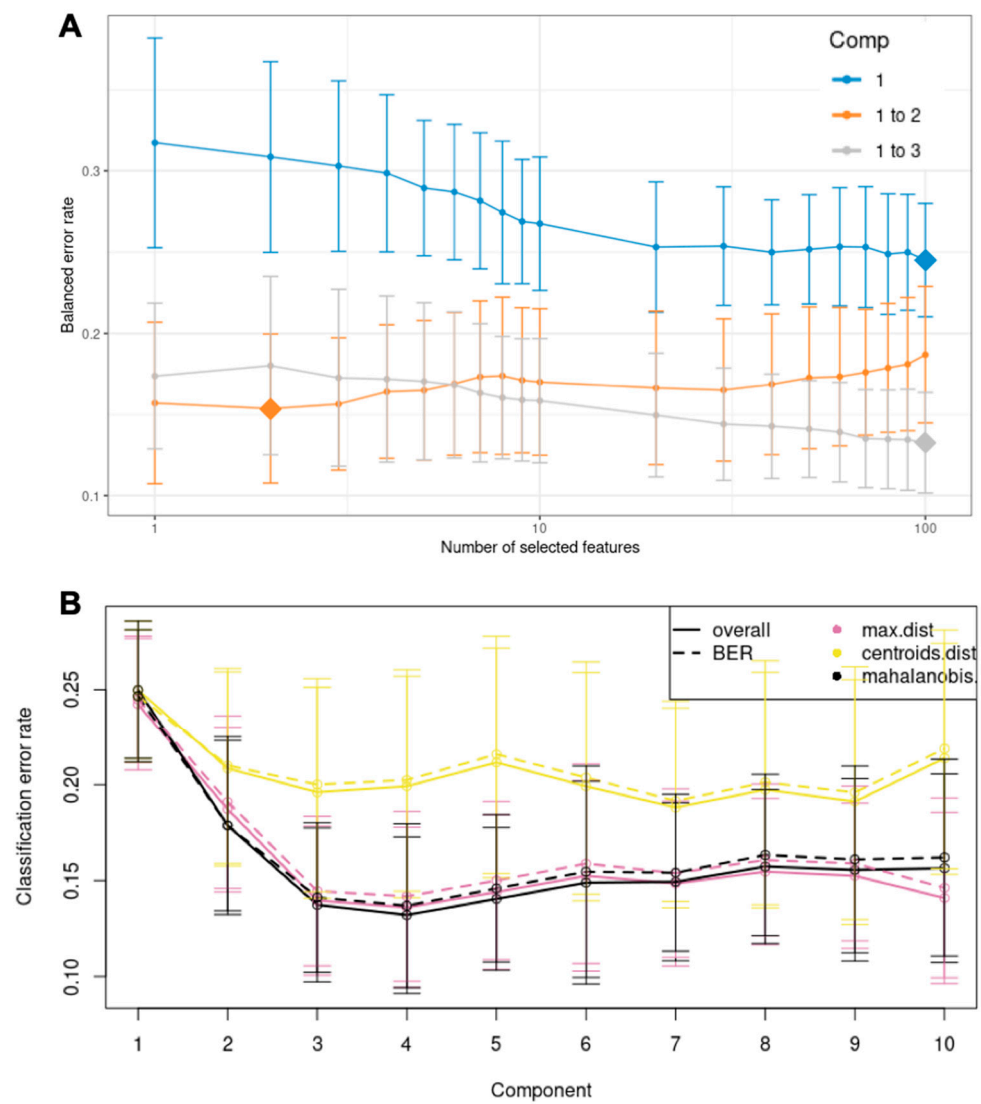

**Figure S4** PLS-DA: features per component and initial error rate. Abbreviations: Comp: component, BER: balanced error rate; max. dist.: maximal distance; centroids dist.: centroids distance

**Table S4** Biological processes and associated proteins in pathway analysis

| biological process and involved proteins              | strength | FDR     |
|-------------------------------------------------------|----------|---------|
| <b>regulation of cholesterol and lipid metabolism</b> | 2.98     | 0.0115  |
| APOC3                                                 |          |         |
| APOA2                                                 |          |         |
| <b>phospholipid efflux</b>                            | 2.32     | 0.0301  |
| APOC3                                                 |          |         |
| APOA2                                                 |          |         |
| <b>Oxygen carrier and binding activity</b>            | 2.24     | 0.027   |
| HBB                                                   |          |         |
| ENSOARP00000011736                                    |          |         |
| <b>Complement and coagulation cascades</b>            | 1.88     | <0.0001 |
| KNG1                                                  |          |         |
| SERPINC1                                              |          |         |
| F2                                                    |          |         |
| ENSOARP00000002890                                    |          |         |
| ENSOARP00000000771                                    |          |         |
| <b>Negative regulation of endopeptidase activity</b>  | 1.35     | 0.0097  |
| ENSOARP00000016410                                    |          |         |
| ITIH2                                                 |          |         |
| KNG1                                                  |          |         |
| SERPINC1                                              |          |         |
| <b>Inflammatory response</b>                          | 1.1      | 0.023   |
| ENSOARP00000002890                                    |          |         |
| KNG1                                                  |          |         |
| F2                                                    |          |         |
| SAA1                                                  |          |         |
| ENSOARP00000000771                                    |          |         |
| <b>Negative regulation of catalytic activity</b>      | 1.05     | 0.0015  |
| ENSOARP00000000771                                    |          |         |
| ENSOARP00000016410                                    |          |         |
| SERPINC2                                              |          |         |
| KNG1                                                  |          |         |
| ITIH2                                                 |          |         |
| APOC3                                                 |          |         |
| APOA2                                                 |          |         |
| <b>Defense responses</b>                              | 0.81     | 0.0314  |
| ENSOARP00000000771                                    |          |         |
| ENSOARP00000002890                                    |          |         |
| APOA2                                                 |          |         |
| F2                                                    |          |         |
| KNG1                                                  |          |         |
| SAA1                                                  |          |         |
| IGJ                                                   |          |         |

Abbreviations: FDR: false discovery rate; APOA2: apolipoprotein A-II; ENSOARP00000000771: uncharacterized protein; ITIH2: inter-alpha-trypsin inhibitor heavy chain H2; HBB: hemoglobin subunit beta; IGJ: immunoglobulin J chain; ENSOARP00000011736: hemoglobin subunit alpha; SAA1: serum amyloid A protein; ENSOARP00000016410: uncharacterized protein, belongs to serpin family; APOC3: apolipoprotein CIII; F2: thrombin; ENSOARP00000002890: complement C4-like isoform X1; SERPINC1: antithrombin-III precursor; KNG1: kininogen-1 isoform X2.

## Supplemental Methods

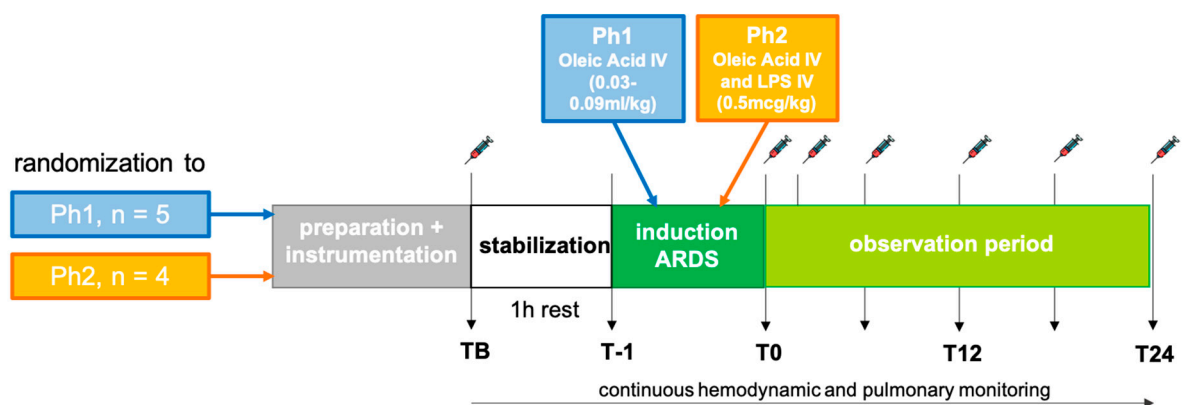

**Figure S5** Study design and time line. Abbreviations: ARDS: Acute Respiratory Distress Syndrome; Ph1 and Ph2: phenotype 1 and 2; IV: intravenously; LPS: lipopolysaccharides; T: time point; TB: baseline time point

### Adherence to main features of experimental ALI according to the ATS definition

The main features of experimental animal models of ALI are:

- Histological evidence of tissue injury* is reported in the LIS score that consists of the components alveolar neutrophils, interstitial neutrophils, hyaline membranes and septal thickening (Figure S2).
- Alteration of the Alveolar Capillary Barrier* is reported as the extent of extravascular lung water (Table S1 and S2).
- Inflammatory Response* to the lung injury is demonstrated in Figure S1 as cytokine levels at different time points.
- Physiological Dysfunction* is described as the extent of decrease in oxygenation and alteration in pulmonary mechanics (Table S1 as compared to Table S2).
